# Supplementary material for: Acupuncture for neurogenesis in experimental ischemic stroke: a systematic review and meta-analysis
Source: PubMed Central journal article supplement (PMC4726177; doi:10.1038/srep19521), 2016-01-20
Supplement: srep19521-s1.pdf [file srep19521-s1.pdf]

## **Supplementary Information**

### **Acupuncture for neurogenesis in experimental ischemic stroke: a systematic review and meta-analysis**

Lin Lu<sup>1, 2</sup>, Xiao-guang Zhang<sup>2</sup>, Linda LD Zhong<sup>1</sup>, Zi-xian Chen<sup>2</sup>, Yan Li<sup>2</sup>, Guo-qing Zheng<sup>2</sup> & Zhao-xiang Bian<sup>1</sup>

1 School of Chinese Medicine, Hong Kong Baptist University, Hong Kong SAR, China.

2 Department of Neurology, the Second Affiliated Hospital and Yuying Children's Hospital of Wenzhou Medical University, Wenzhou 325027, China.

The Supplementary Information consists of one PDF document containing Figures S1-S5,

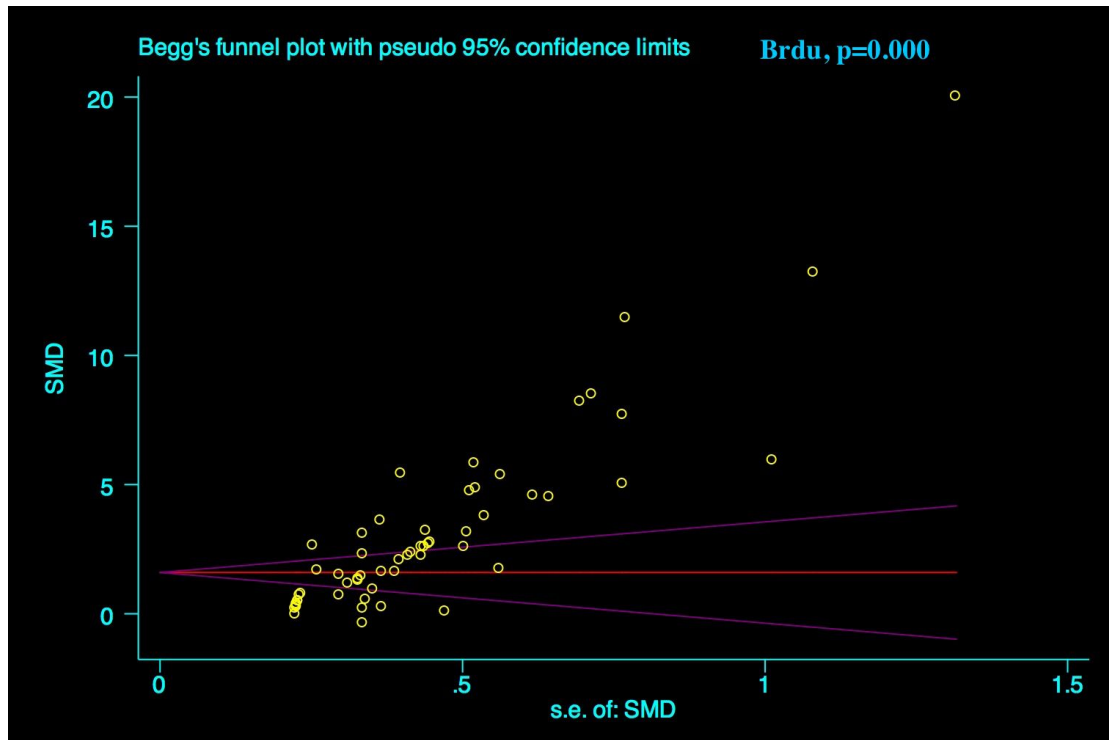

Figure S1: Linear regression analysis of the funnel plot of acupuncture for Brdu marker of neurogenesis in experimental ischemic stroke (Egger's test,  $p=0.000$ ).

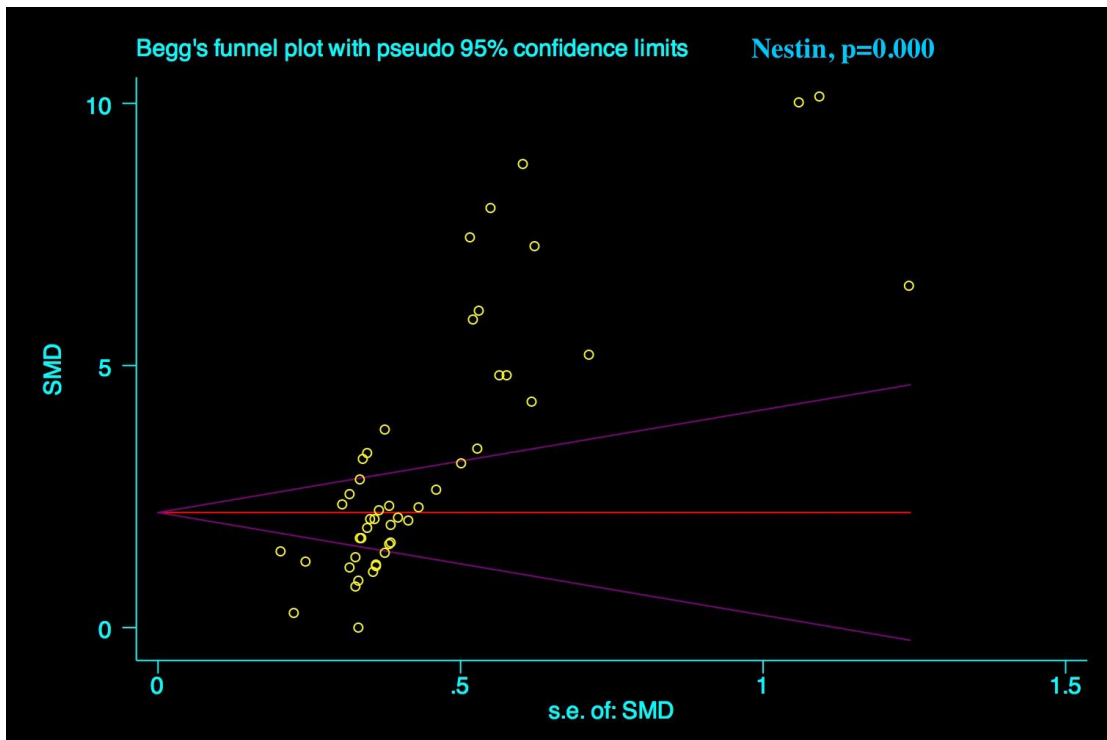

Figure S2: Linear regression analysis of the funnel plot of acupuncture for Nestin marker of neurogenesis in experimental ischemic stroke (Egger's test,  $p=0.000$ ).

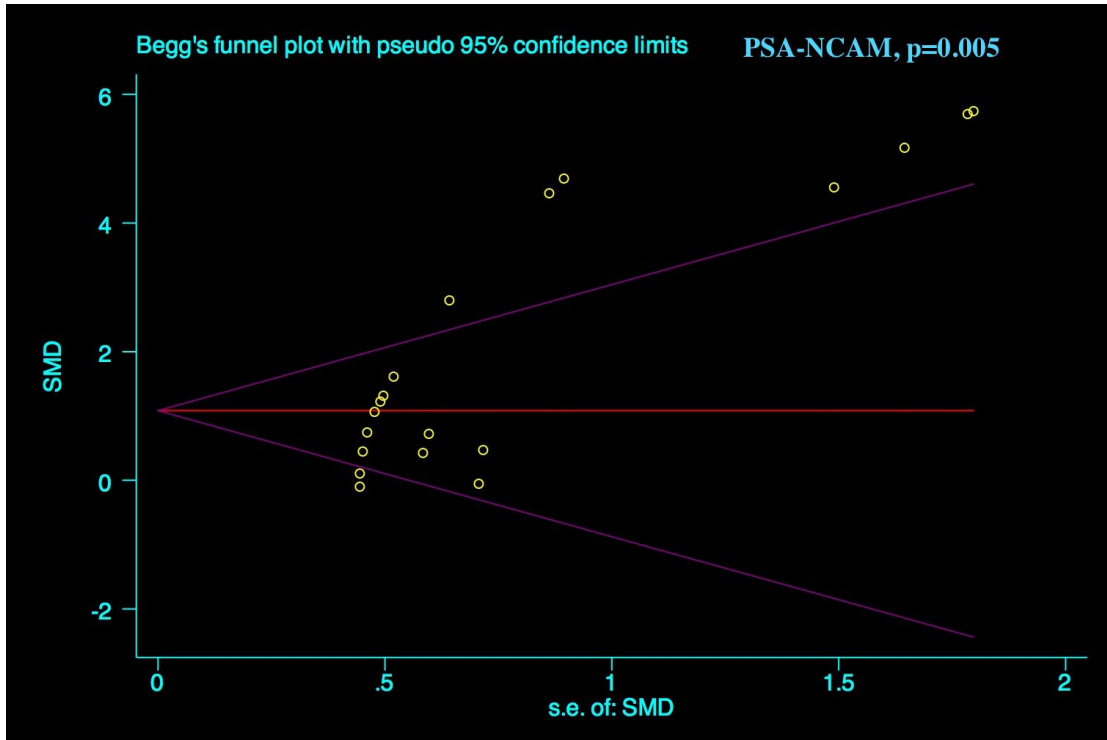

Figure S3: Linear regression analysis of the funnel plot of acupuncture for PSA-NCAM marker of neurogenesis in experimental ischemic stroke (Egger's test,  $p=0.005$ ).

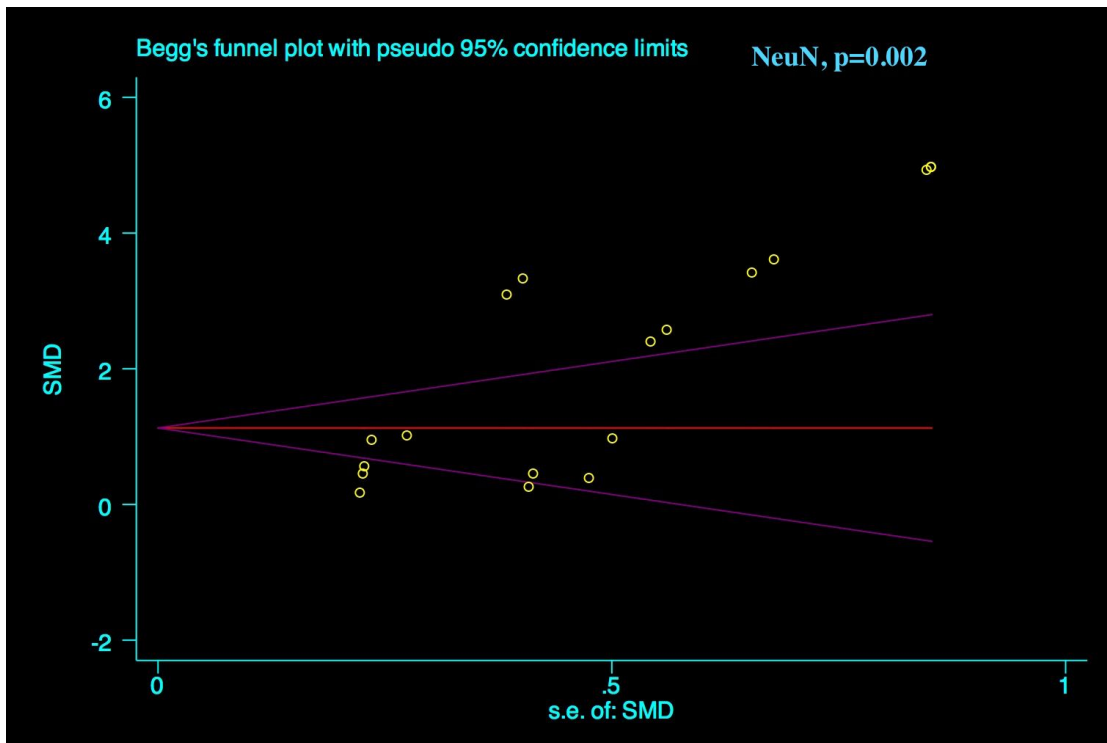

Figure S4: Linear regression analysis of the funnel plot of acupuncture for NeuN marker of neurogenesis in experimental ischemic stroke (Egger's test,  $p=0.002$ ).

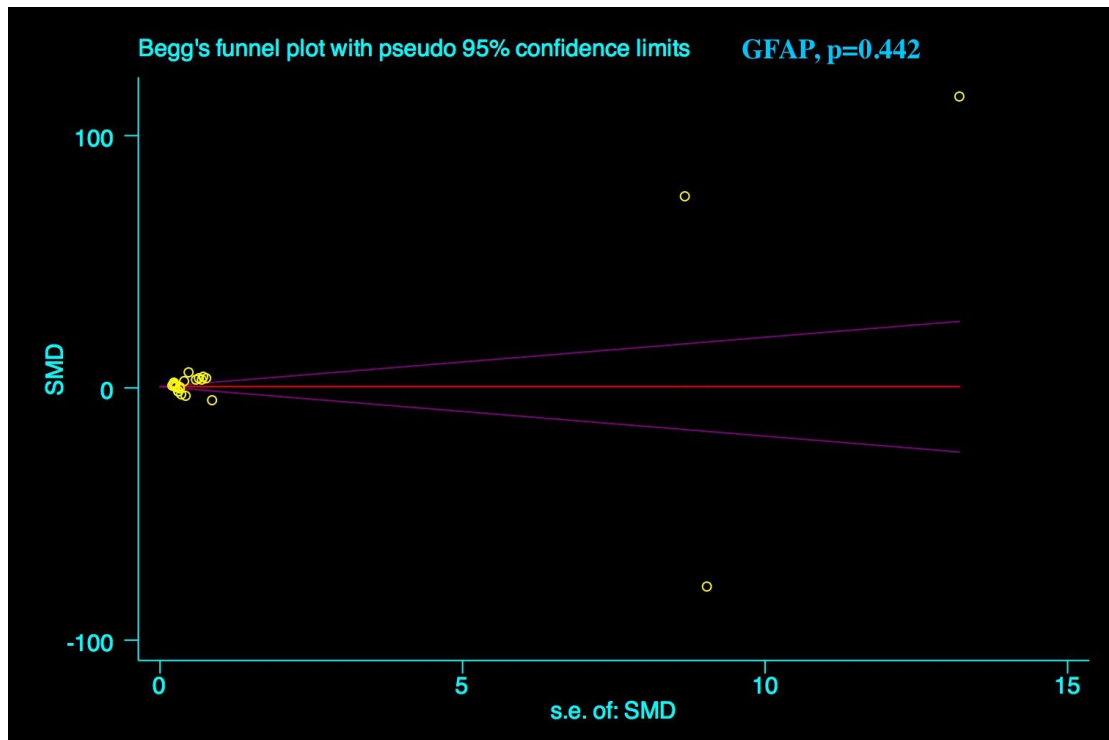

Figure S5: Linear regression analysis of the funnel plot of acupuncture for GFAP marker of neurogenesis in experimental ischemic stroke (Egger's test, p=0.442).
